# Supplementary material for: HDAC6 inhibition by ITF3756 modulates PD-L1 expression and monocyte phenotype: insights for a promising immune checkpoint blockade co-treatment therapy
Source: Front Immunol. 2025 May 13;16:1546939. doi: 10.3389/fimmu.2025.1546939 (PMC12106391; doi:10.3389/fimmu.2025.1546939)
Supplement: Supplementary file 5 [file Table4.xlsx]

## Sheet: Supplementary_Table_4
	Supplementary Table 4
	Differential Gene Expression Analysis of STAT1, RELA, or IRF3 Target Genes involved in chemokine, immune response, and macrophage polarization pathways
				TNF vs CTR			TNF_ITF3756 vs TNF
	Gene	Group	Transcription Factor	log2FoldChange	padj	DEG	log2FoldChange	padj	DEG
	CCL2	Chemokine	RELA	2.08232	1.78e-09	UP	-2.41835	0.00416568	DOWN
	CCL2	Chemokine	STAT1	2.08232	1.78e-09	UP	-2.41835	0.00416568	DOWN
	CCL3	Chemokine	RELA	4.51365	1.01e-36	UP	-0.0500958	0.864566	NO
	CCL3	Chemokine	STAT1	4.51365	1.01e-36	UP	-0.0500958	0.864566	NO
	CCL4	Chemokine	RELA	5.71155	3.6e-42	UP	-0.368062	0.0375488	DOWN
	CCL5	Chemokine	IRF3	2.36376	8.07e-11	UP	-0.789068	0.00961356	DOWN
	CCL5	Chemokine	RELA	2.36376	8.07e-11	UP	-0.789068	0.00961356	DOWN
	CCR5	Chemokine	RELA	-0.649035	0.0006426	DOWN	-1.22381	3.84e-06	DOWN
	CCR5	Chemokine	STAT1	-0.649035	0.0006426	DOWN	-1.22381	3.84e-06	DOWN
	CXCL1	Chemokine	RELA	3.49013	8.98e-16	UP	-0.665937	0.0629524	NO
	CXCL10	Chemokine	RELA	0.420632	0.561133	NO	-2.30724	0.0271718	DOWN
	CXCL10	Chemokine	STAT1	0.420632	0.561133	NO	-2.30724	0.0271718	DOWN
	CXCL10	Chemokine	IRF3	0.420632	0.561133	NO	-2.30724	0.0271718	DOWN
	CXCL2	Chemokine	RELA	1.88734	2.68e-06	UP	-0.68781	0.0230175	DOWN
	CXCL8	Chemokine	RELA	4.3586	5.41e-23	UP	-0.582436	0.000646935	DOWN
	CXCL8	Chemokine	STAT1	4.3586	5.41e-23	UP	-0.582436	0.000646935	DOWN
	CXCL9	Chemokine	STAT1	1.55033	0.0358128	UP	-2.0705	0.00255697	DOWN
	CXCR4	Chemokine	RELA	-1.51745	6.59e-07	DOWN	-0.97611	0.00273481	DOWN
	CSF1	Growth	STAT1	1.36815	8.36e-10	UP	-0.511347	0.259177	NO
	CSF1	Growth	RELA	1.36815	8.36e-10	UP	-0.511347	0.259177	NO
	IL1B	Growth	RELA	4.50107	1.28e-40	UP	-0.129606	0.578395	NO
	IL1B	Growth	STAT1	4.50107	1.28e-40	UP	-0.129606	0.578395	NO
	IL6	Growth	RELA	4.77652	4.54e-22	UP	0.138216	0.808611	NO
	IL6	Growth	STAT1	4.77652	4.54e-22	UP	0.138216	0.808611	NO
	TNF	Growth	RELA	2.21066	1.36e-13	UP	-0.76566	0.00199787	DOWN
	VEGFA	Growth	RELA	0.60114	0.132481	NO	-0.509974	0.0728082	NO
	VEGFA	Growth	STAT1	0.60114	0.132481	NO	-0.509974	0.0728082	NO
	CD86	M1	STAT1	-1.26597	1.56e-06	DOWN	0.305448	0.107654	NO
	CD86	M1	RELA	-1.26597	1.56e-06	DOWN	0.305448	0.107654	NO
	CXCL10	M1	RELA	0.420632	0.561133	NO	-2.30724	0.0271718	DOWN
	CXCL10	M1	STAT1	0.420632	0.561133	NO	-2.30724	0.0271718	DOWN
	CXCL10	M1	IRF3	0.420632	0.561133	NO	-2.30724	0.0271718	DOWN
	CXCL11	M1	STAT1	1.26609	0.267099	NO	-2.21082	0.121129	NO
	CXCL9	M1	STAT1	1.55033	0.0358128	UP	-2.0705	0.00255697	DOWN
	IL1B	M1	RELA	4.50107	1.28e-40	UP	-0.129606	0.578395	NO
	IL1B	M1	STAT1	4.50107	1.28e-40	UP	-0.129606	0.578395	NO
	IL23A	M1	RELA	1.29409	0.000801585	UP	0.570384	0.133102	NO
	IL6	M1	RELA	4.77652	4.54e-22	UP	0.138216	0.808611	NO
	IL6	M1	STAT1	4.77652	4.54e-22	UP	0.138216	0.808611	NO
	TNF	M1	RELA	2.21066	1.36e-13	UP	-0.76566	0.00199787	DOWN
	IL10	M2	RELA	-1.75265	0.00660365	DOWN	-0.479198	0.690931	NO
	IL10	M2	STAT1	-1.75265	0.00660365	DOWN	-0.479198	0.690931	NO
	VEGFA	M2	RELA	0.60114	0.132481	NO	-0.509974	0.0728082	NO
	VEGFA	M2	STAT1	0.60114	0.132481	NO	-0.509974	0.0728082	NO
	CD14	Monocytes	STAT1	-0.158688	0.636109	NO	-0.493922	0.0454627	DOWN
